# Supplementary material for: Hybrid amino/iminopyridines with auxiliary phosphines enabling active zinc catalysts for the ring-opening polymerization of lactide
Source: Royal Society of Chemistry journal article supplement (doi:10.1039/d5dt02857d), 2026-01-01
Supplement: d5dt02857d1.pdf [file d5dt02857d1.pdf]

## Supporting information

for

### Hybrid amino/iminopyridines with auxiliary phosphines enhancing their zinc complex catalysts for the ring-opening polymerization of lactide

Xiaopan Xue,<sup>a,b</sup> Dongzhi Zhu,<sup>b</sup> Wenjuan Zhang,<sup>\*a</sup> Tongxin Zheng,<sup>a,b</sup> Rui Wang,<sup>a</sup> Yanping Ma,<sup>b</sup> Wen-Hua Sun<sup>\*b</sup>

<sup>a</sup> Beijing Key Laboratory of Clothing Materials R&D and Assessment, Beijing Engineering Research Center of Textile Nanofiber, School of Materials Design and Engineering, Beijing Institute of Fashion Technology, Beijing 100029, China. E-mail: zhangwj@bift.edu.cn.

<sup>b</sup> Key Laboratory of Engineering Plastics and Beijing National Laboratory for Molecular Science, Institute of Chemistry, Chinese Academy of Sciences, Beijing 100190, China. E-mail: whsun@iccas.ac.cn

#### Table of Contents Pages

|                                                                                                                                     |         |
|-------------------------------------------------------------------------------------------------------------------------------------|---------|
| 1. <sup>1</sup> H NMR spectra of Diphenylphosphinoethylamine and monoimino pyridines SI-S5 (Figures S1 – S6)                        | S2-S4   |
| 2. <sup>1</sup> H/ <sup>13</sup> C/ <sup>31</sup> P NMR spectra of <b>L1</b> – <b>L6</b> (Figures S7 – S23)                         | S5-S13  |
| 3. <sup>1</sup> H/ <sup>13</sup> C/ <sup>31</sup> P NMR spectra of <b>Zn1</b> – <b>Zn6</b> (Figures S24 – S38)                      | S13-S20 |
| 4. Decoupled <sup>1</sup> H NMR of poly(rac-LA) by <b>Zn4</b> (Figure S39)                                                          | S21     |
| 5. Table SI-1 Comparison of the <sup>31</sup> P NMR chemical shifts for <b>L1</b> - <b>L5</b> with those in <b>Zn1</b> - <b>Zn5</b> | S21     |

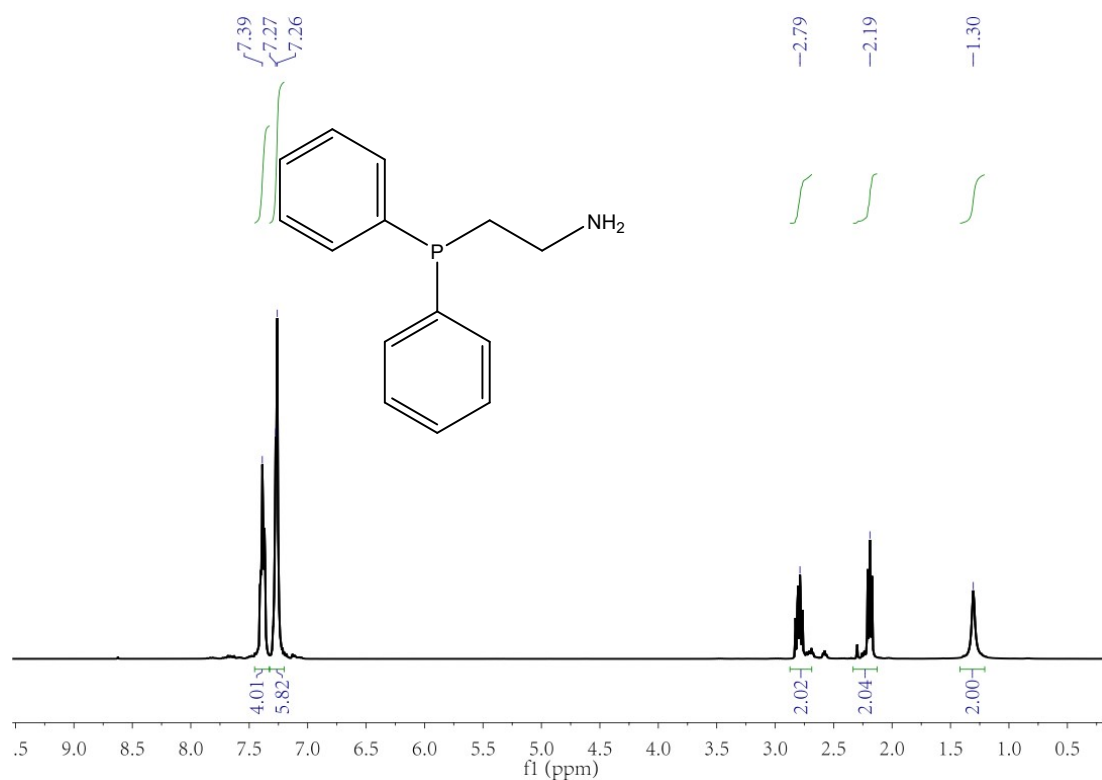

**Figure S1** <sup>1</sup>H NMR spectrum of Diphenylphosphinoethylamine; recorded in CDCl<sub>3</sub> at 25 °C

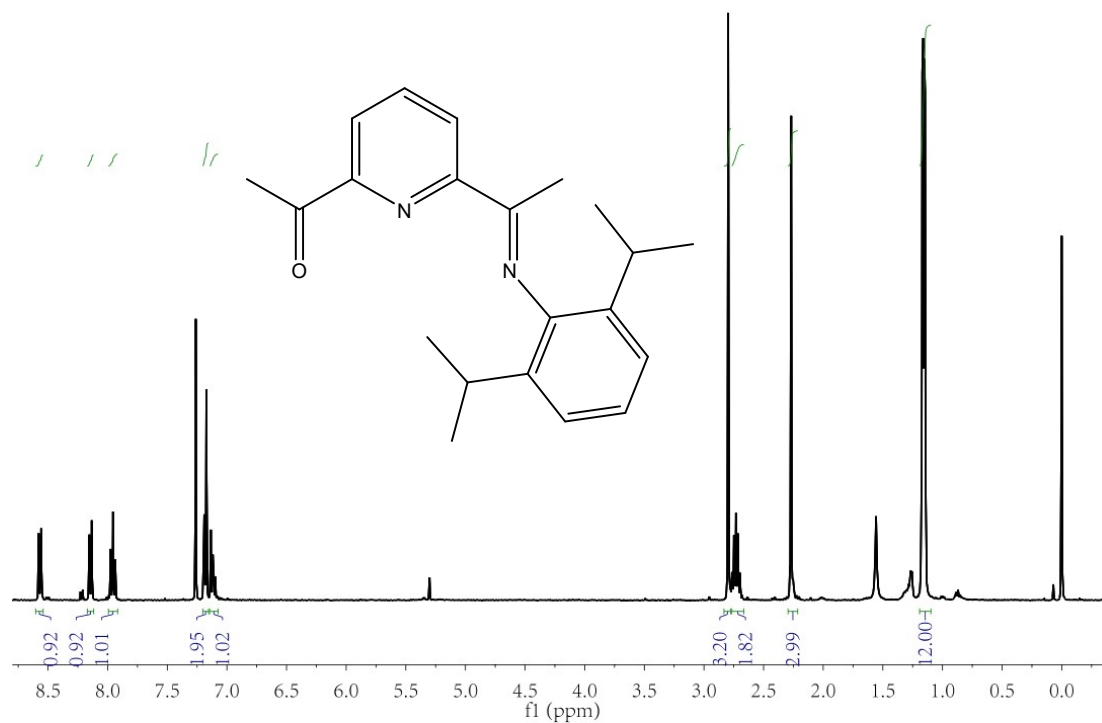

**Figure S2** <sup>1</sup>H NMR spectrum of monoimino SI recorded in CDCl<sub>3</sub> at 25 °C

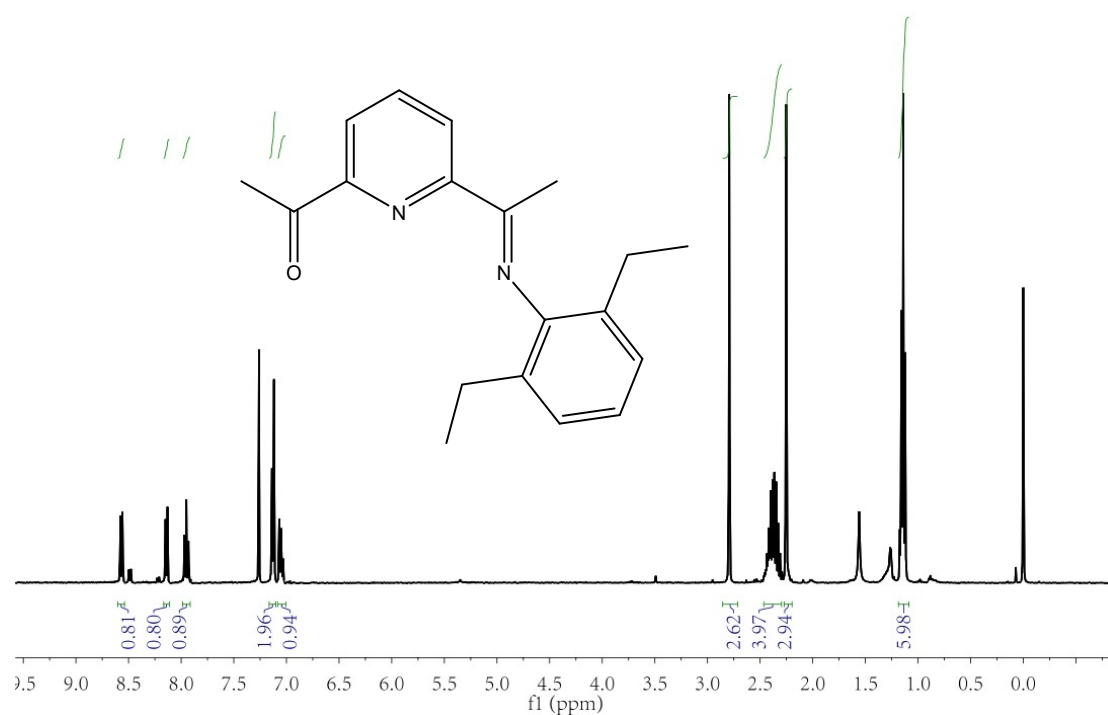

**Figure S3** <sup>1</sup>H NMR spectrum of monoimino S2 recorded in CDCl<sub>3</sub> at 25 °C

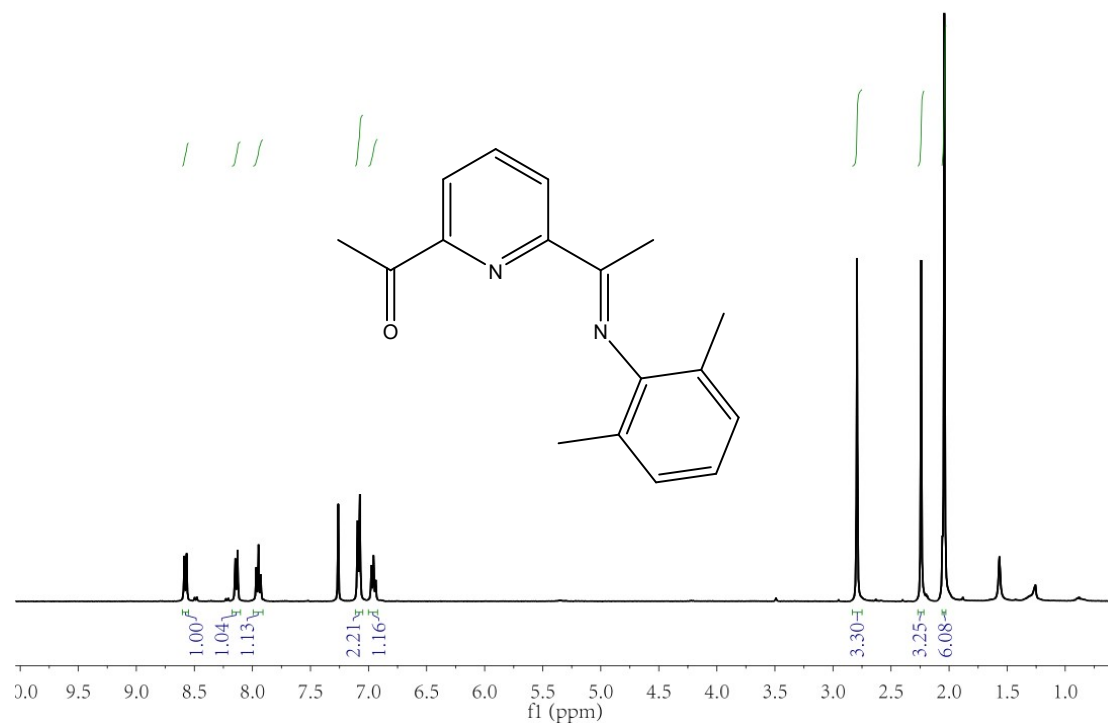

**Figure S4** <sup>1</sup>H NMR spectrum of monoimino S3 recorded in CDCl<sub>3</sub> at 25 °C

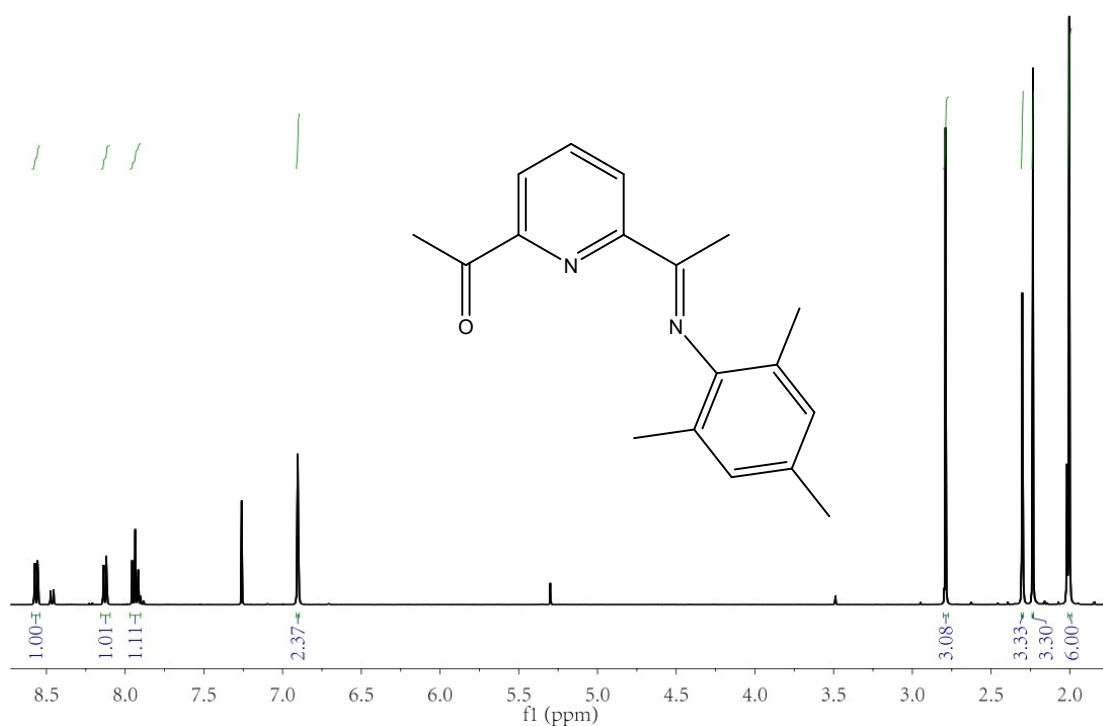

**Figure S5** <sup>1</sup>H NMR spectrum of monoimino S4 recorded in CDCl<sub>3</sub> at 25 °C

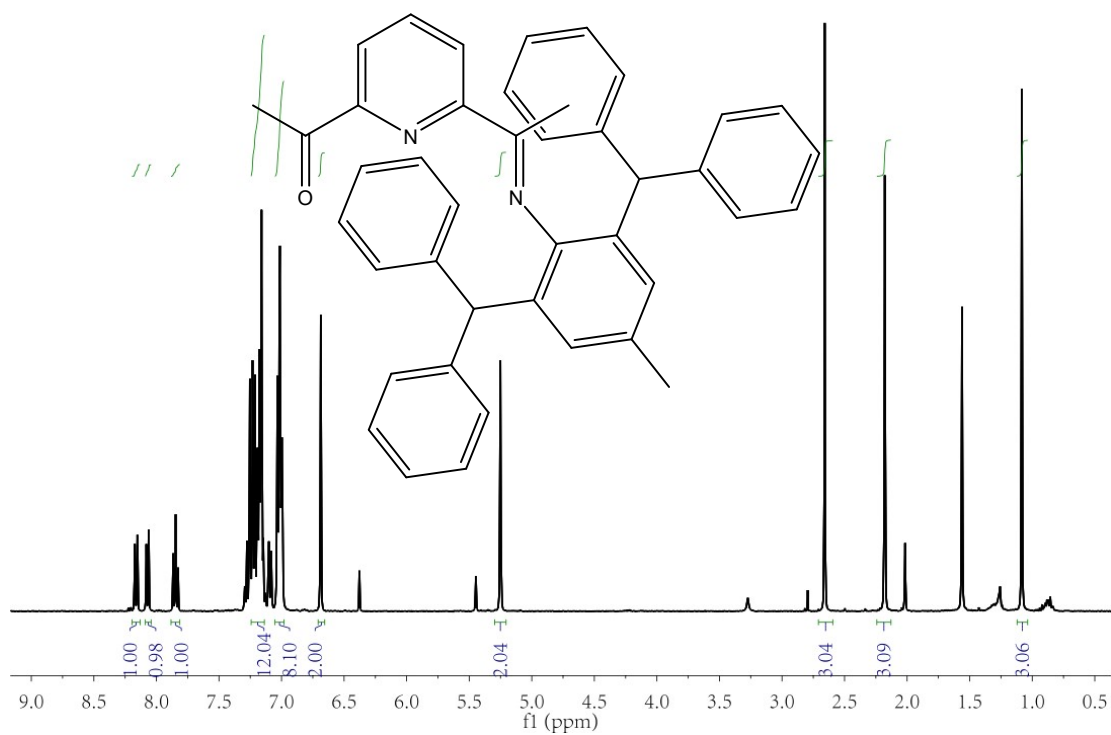

**Figure S6** <sup>1</sup>H NMR spectrum of monoimino S5 recorded in CDCl<sub>3</sub> at 25 °C

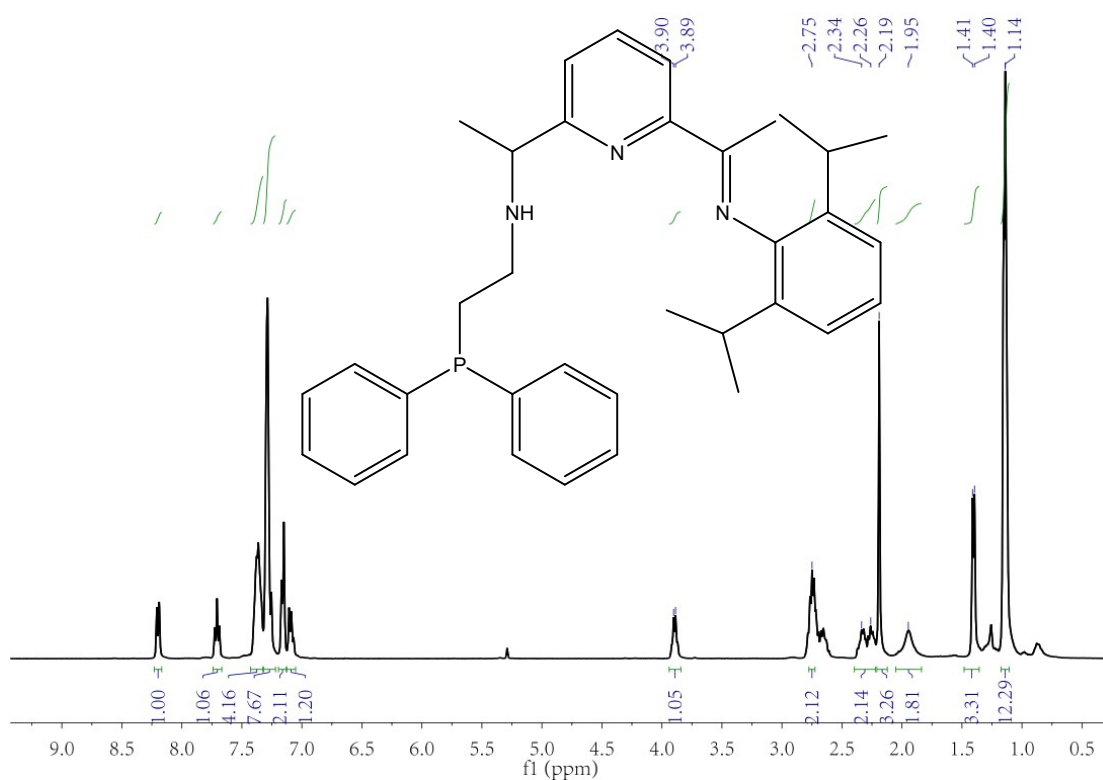

**Figure S7** <sup>1</sup>H NMR spectrum of L1 recorded in CDCl<sub>3</sub> at 25 °C

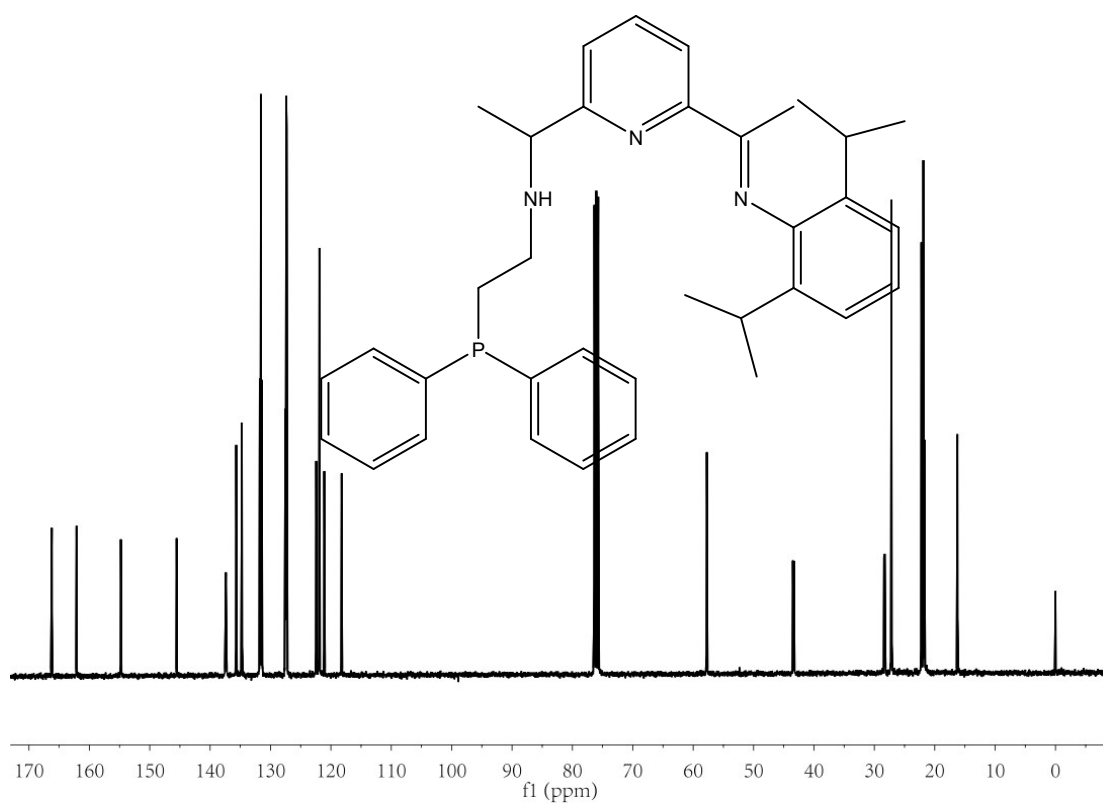

**Figure S8** <sup>13</sup>C NMR spectrum of L1 recorded in CDCl<sub>3</sub> at 25 °C

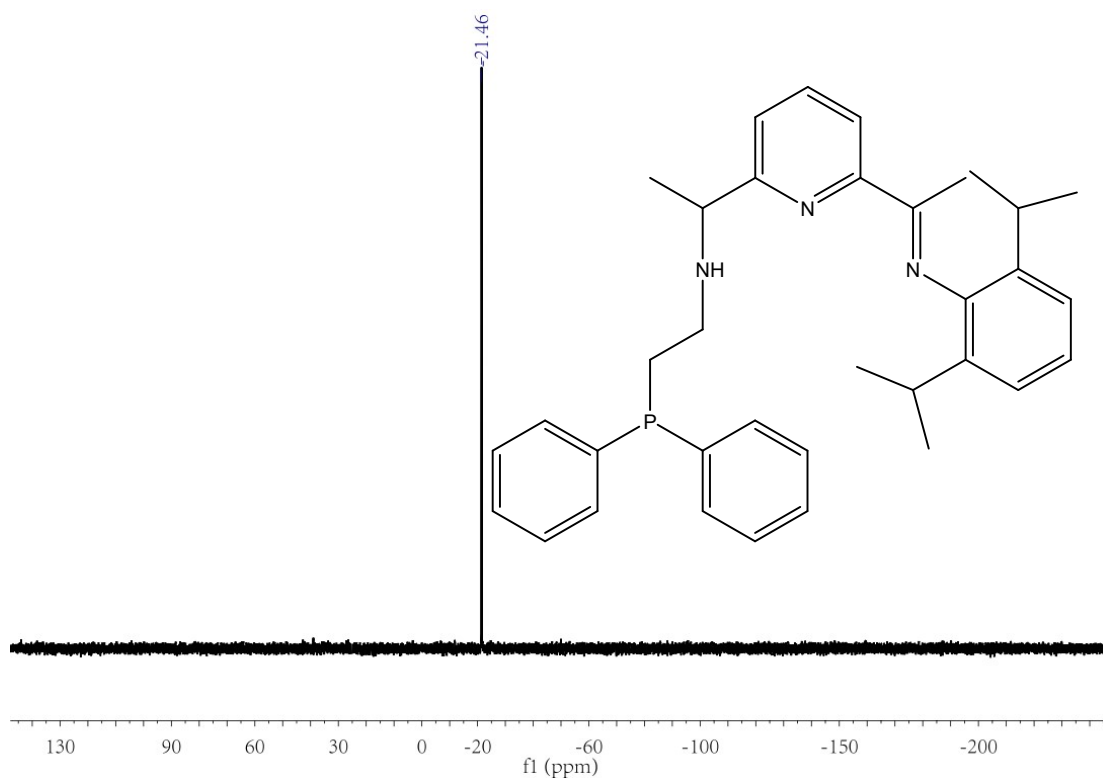

**Figure S9** <sup>31</sup>P NMR spectrum of L1 recorded in CDCl<sub>3</sub> at 25 °C

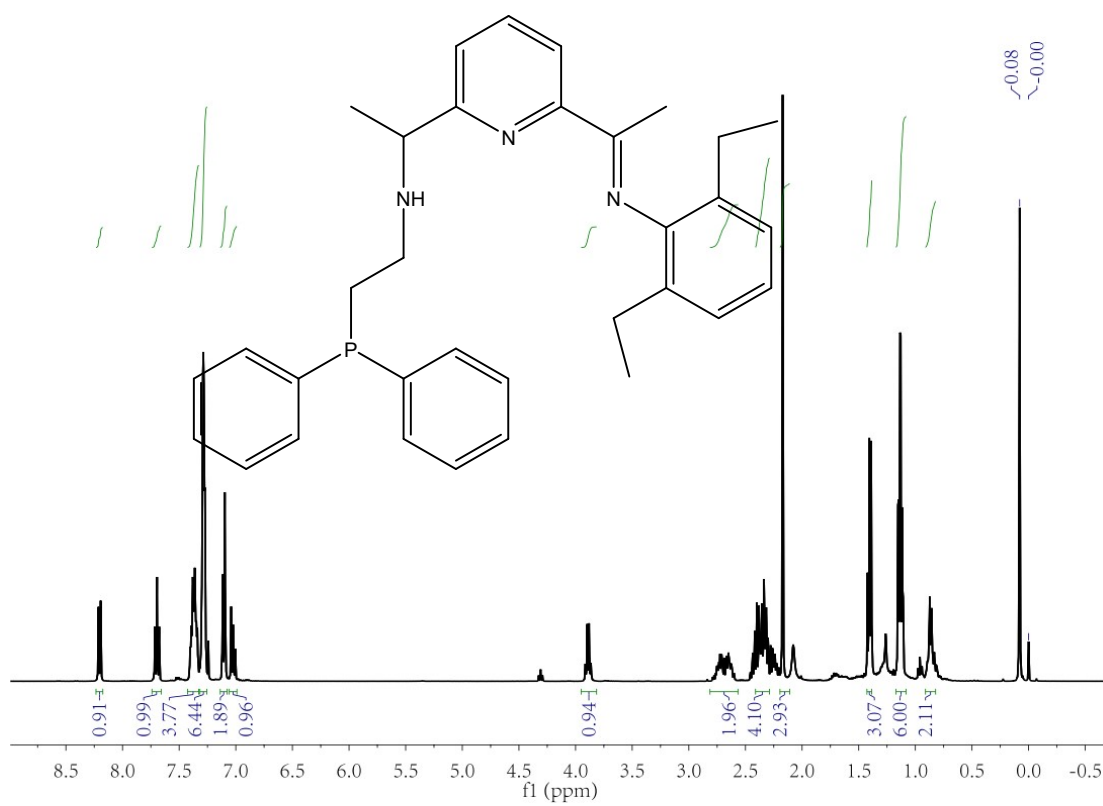

**Figure S10** <sup>1</sup>H NMR spectrum of L2 recorded in CDCl<sub>3</sub> at 25 °C

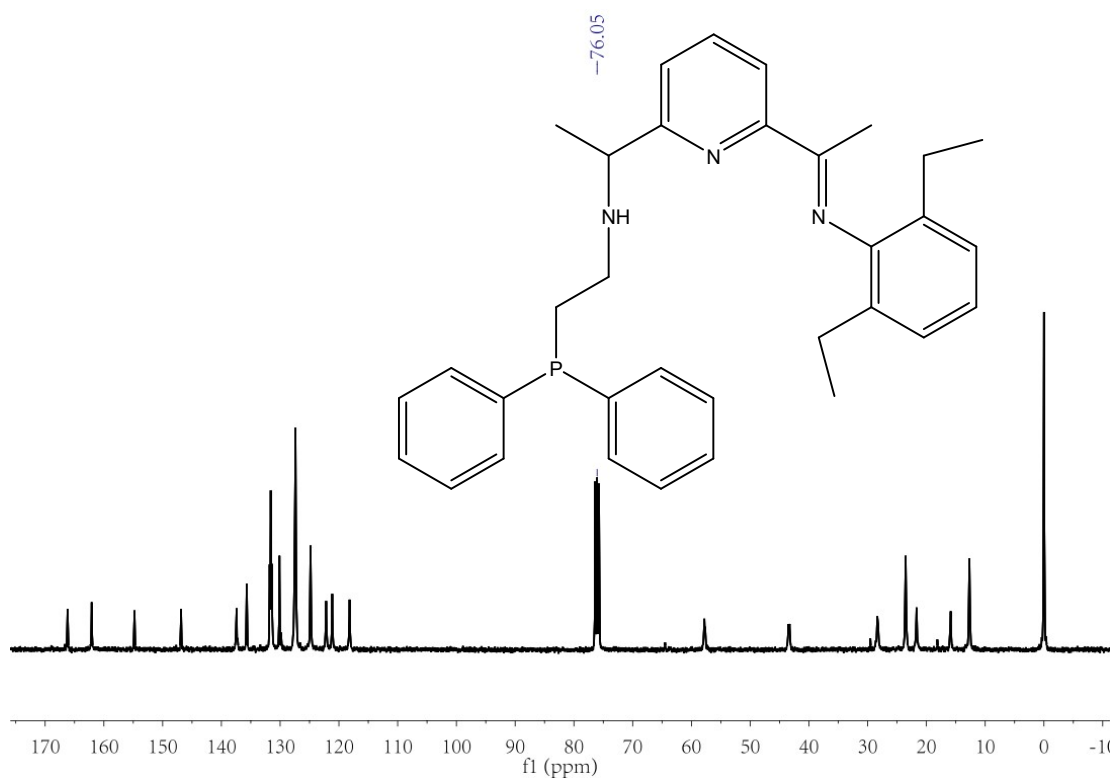

**Figure S11** <sup>13</sup>C NMR spectrum of L2 recorded in CDCl<sub>3</sub> at 25 °C

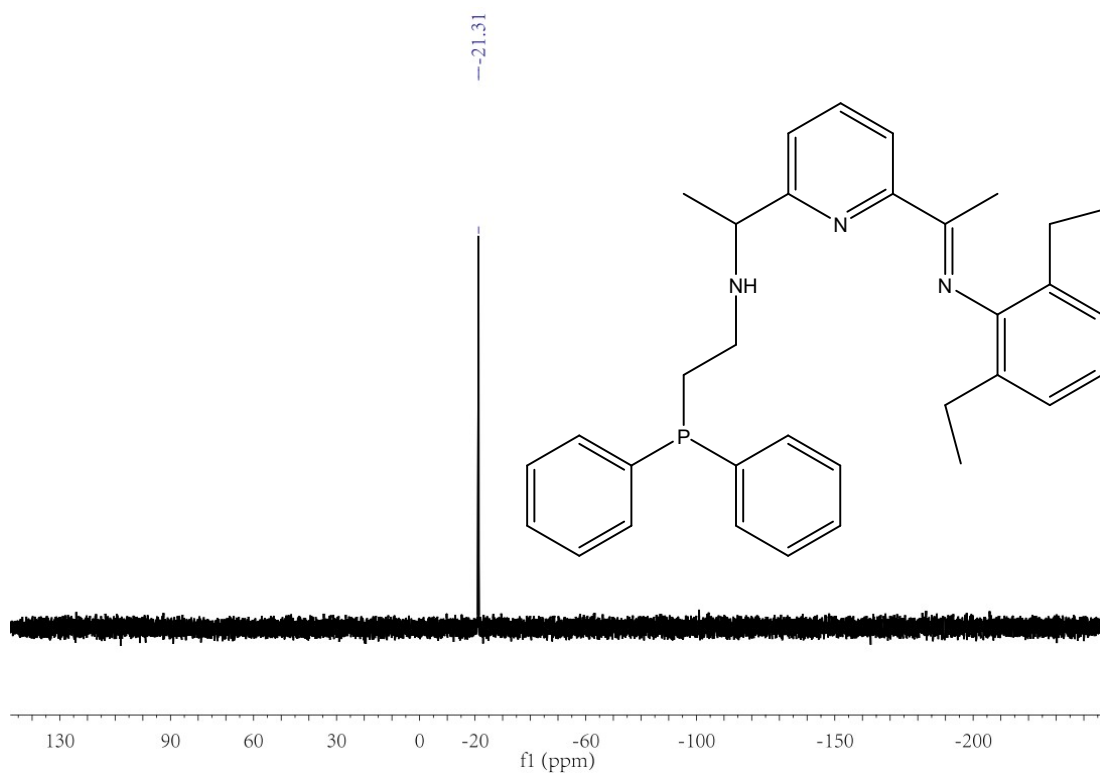

**Figure S12** <sup>31</sup>P NMR spectrum of L2 recorded in CDCl<sub>3</sub> at 25 °C

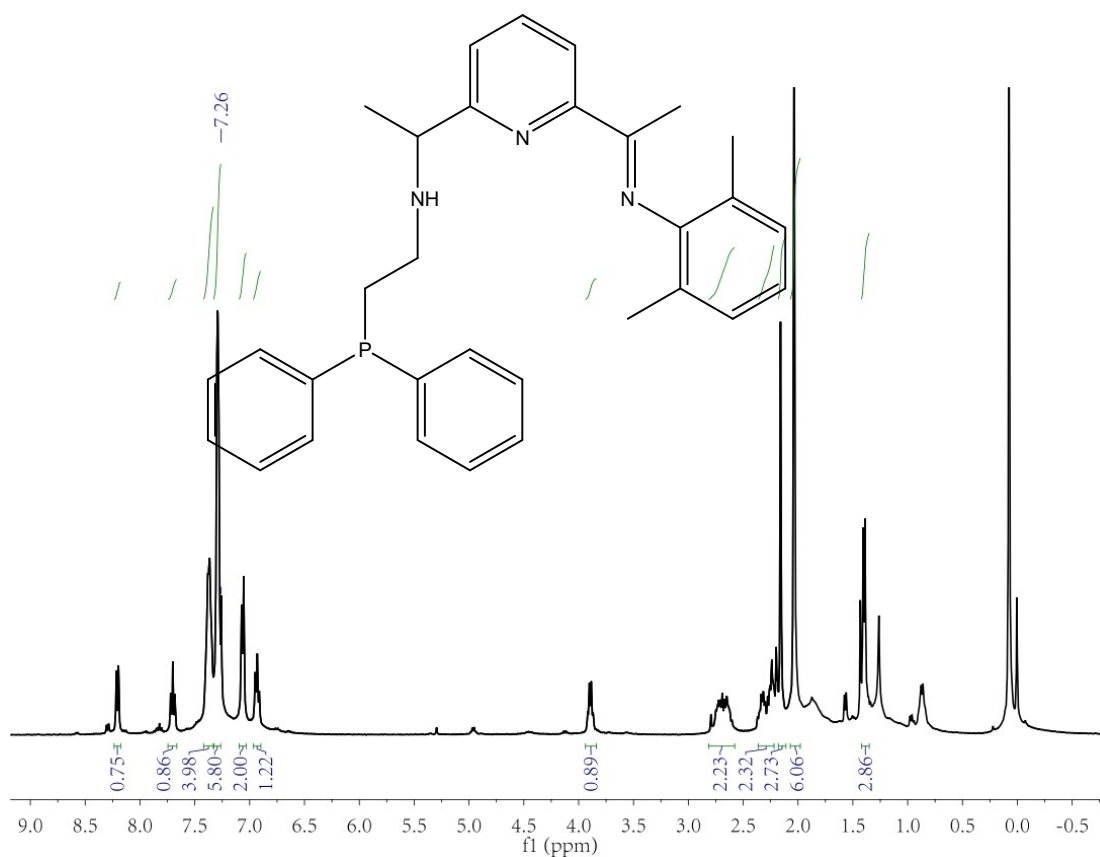

**Figure S13** <sup>1</sup>H NMR spectrum of L3 recorded in CDCl<sub>3</sub> at 25 °C

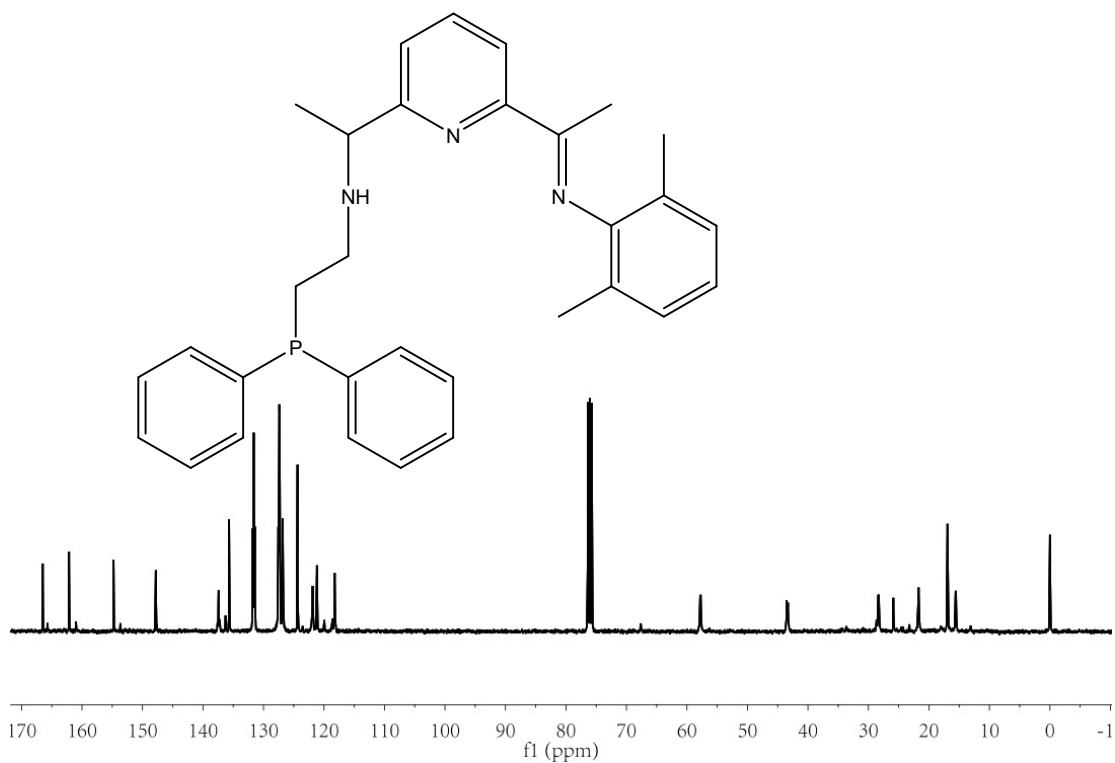

**Figure S14** <sup>13</sup>C NMR spectrum of L3 recorded in CDCl<sub>3</sub> at 25 °C



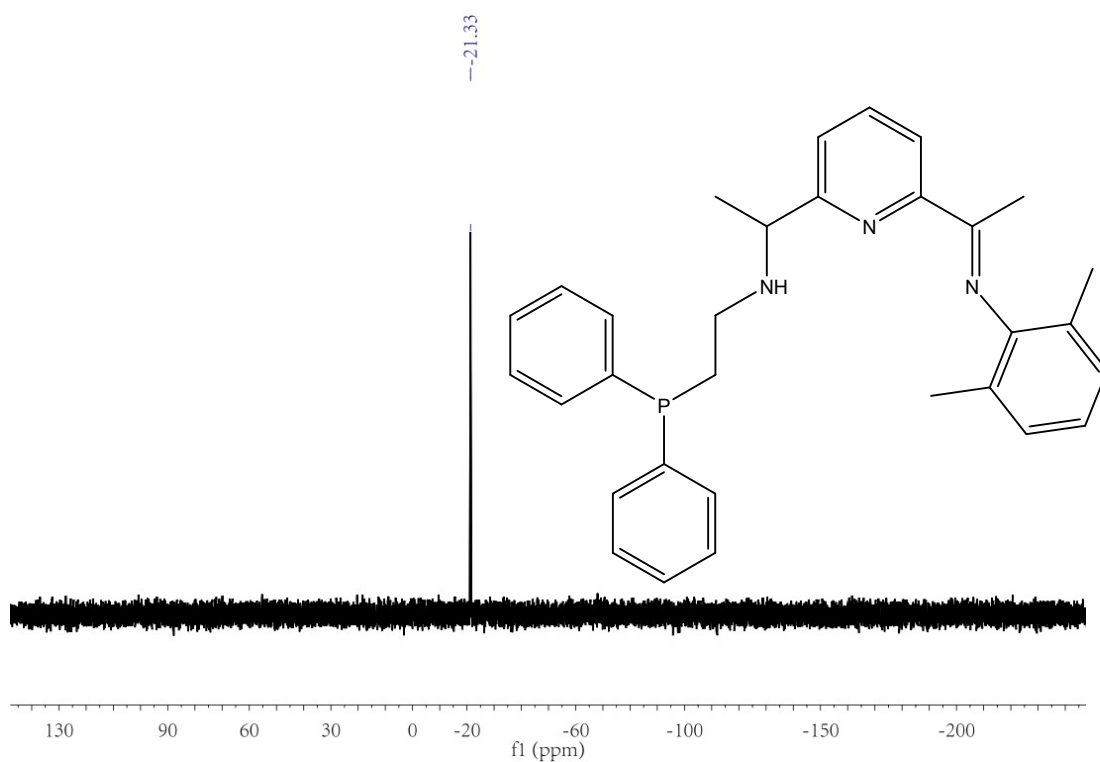

**Figure S15**  $^{31}\text{P}$  NMR spectrum of L3 recorded in  $\text{CDCl}_3$  at 25 °C

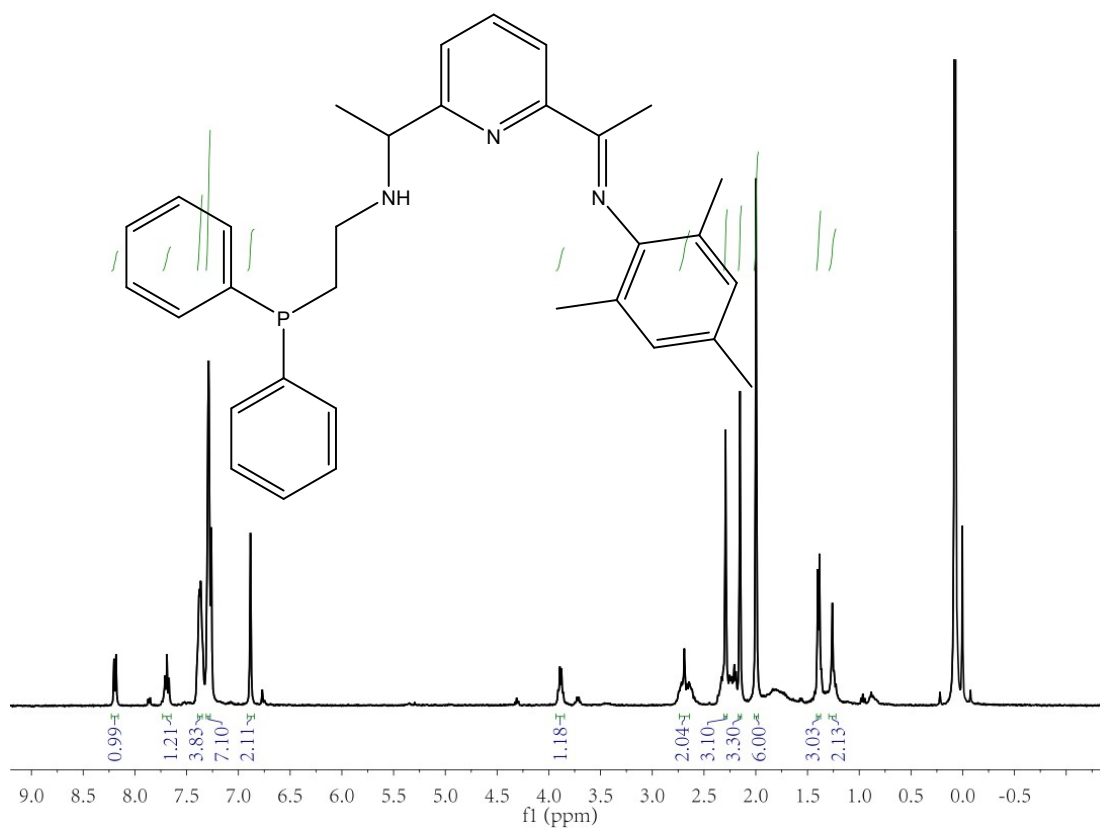

**Figure S16**  $^1\text{H}$  NMR spectrum of L4 recorded in  $\text{CDCl}_3$  at 25 °C

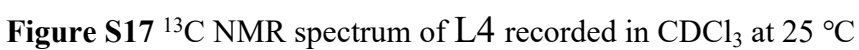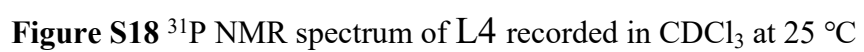

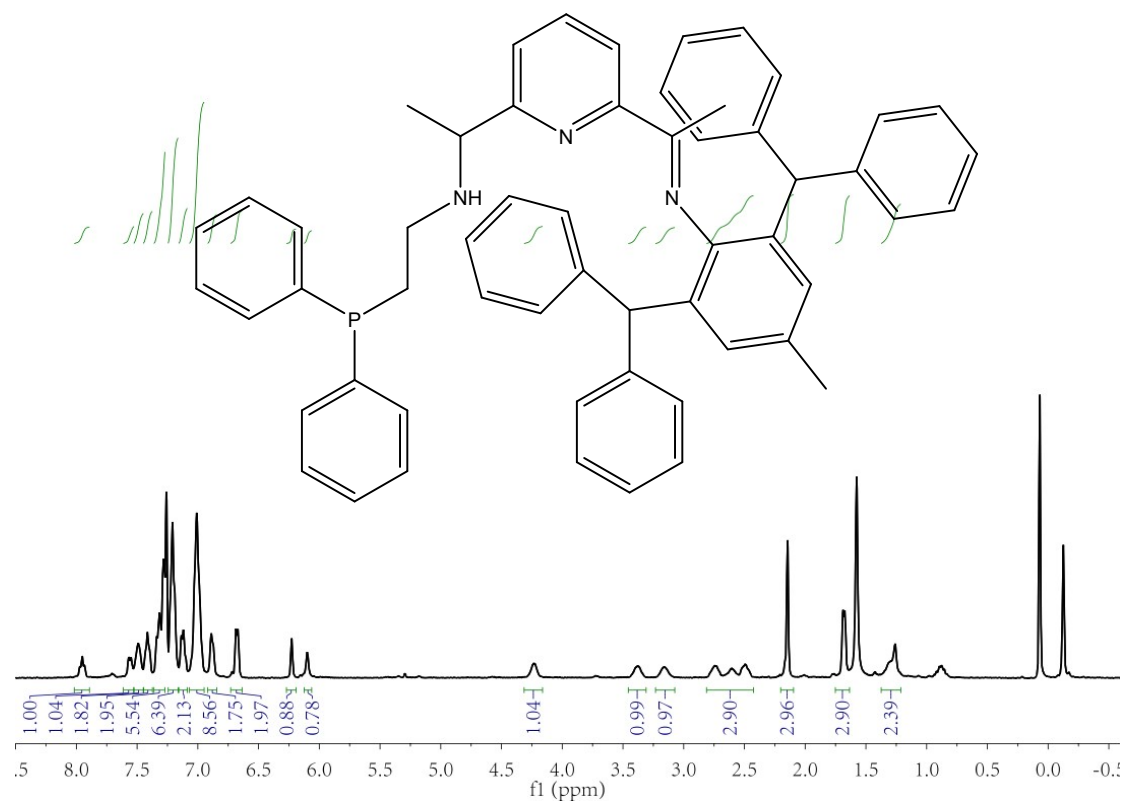

**Figure S19**  $^1\text{H}$  NMR spectrum of L5 recorded in  $\text{CDCl}_3$  at 25  $^\circ\text{C}$

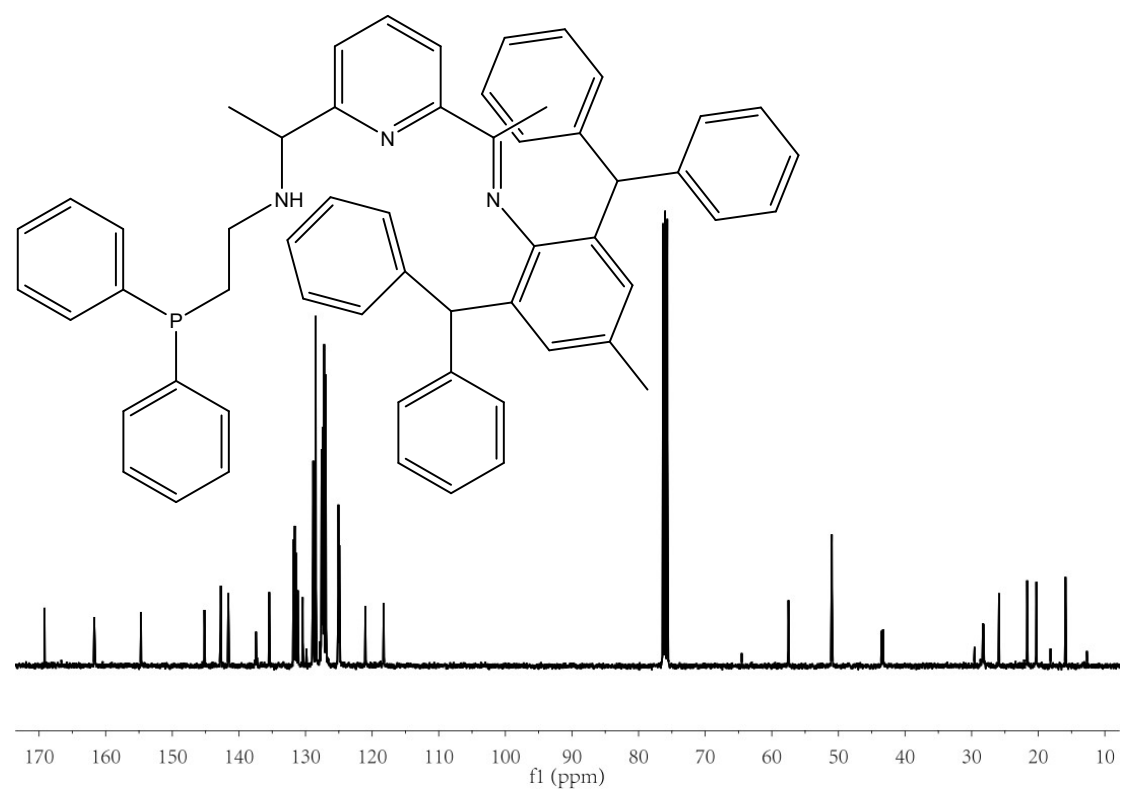

**Figure S20**  $^{13}\text{C}$  NMR spectrum of L5 recorded in  $\text{CDCl}_3$  at 25 °C

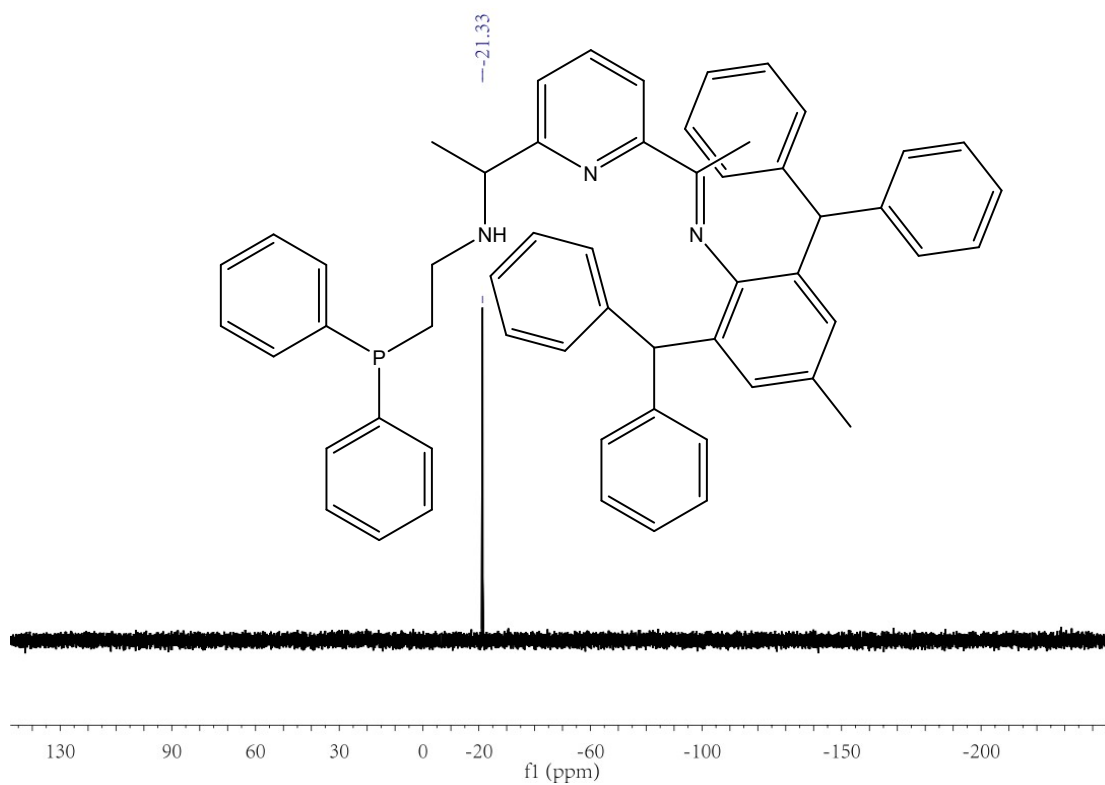

**Figure S21**  $^{31}\text{P}$  NMR spectrum of L5 recorded in  $\text{CDCl}_3$  at 25 °C

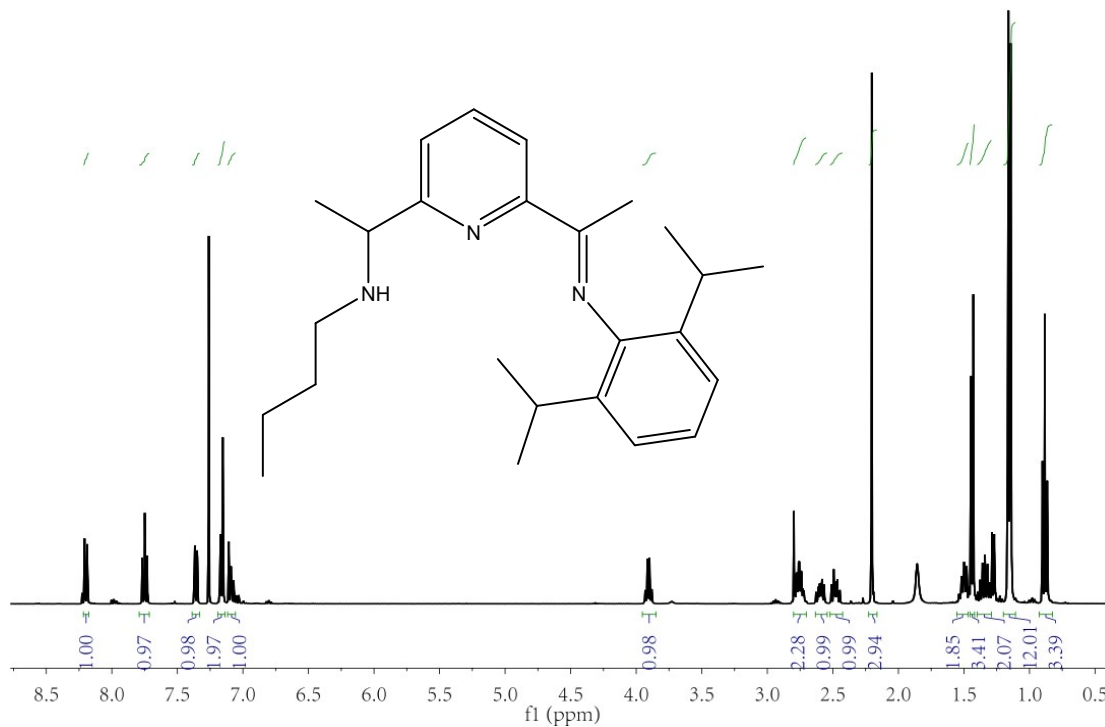

**Figure S22**  $^1\text{H}$  NMR spectrum of L6 recorded in  $\text{CDCl}_3$  at 25 °C



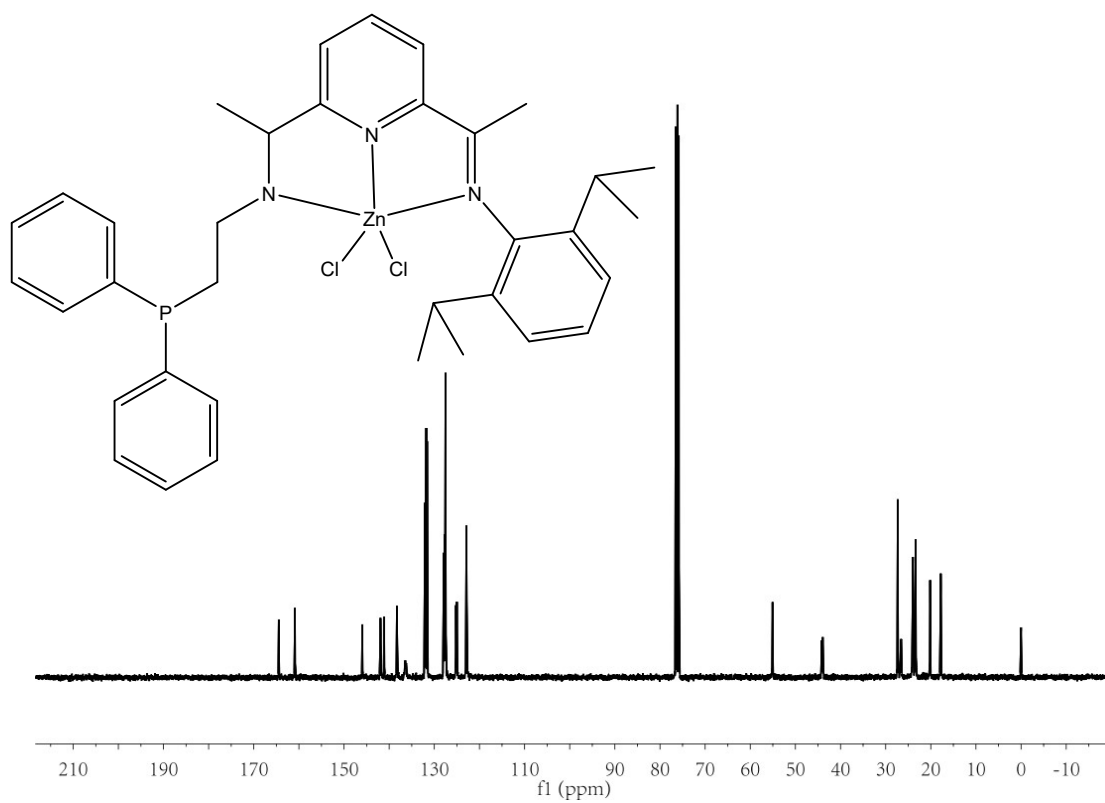

**Figure S25**  $^{13}\text{C}$  NMR spectrum of Zn1 recorded in  $\text{CDCl}_3$  at  $25^\circ\text{C}$

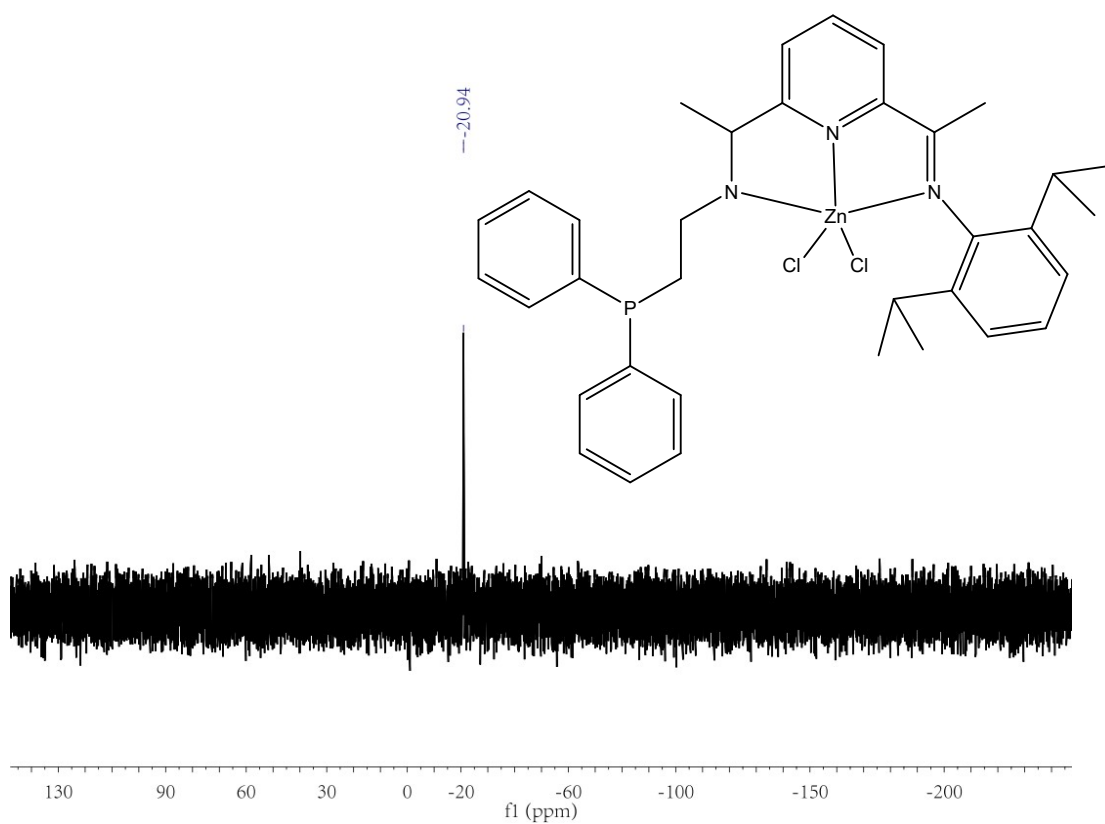

**Figure S26**  $^{31}\text{P}$  NMR spectrum of Zn1 recorded in  $\text{CDCl}_3$  at  $25^\circ\text{C}$

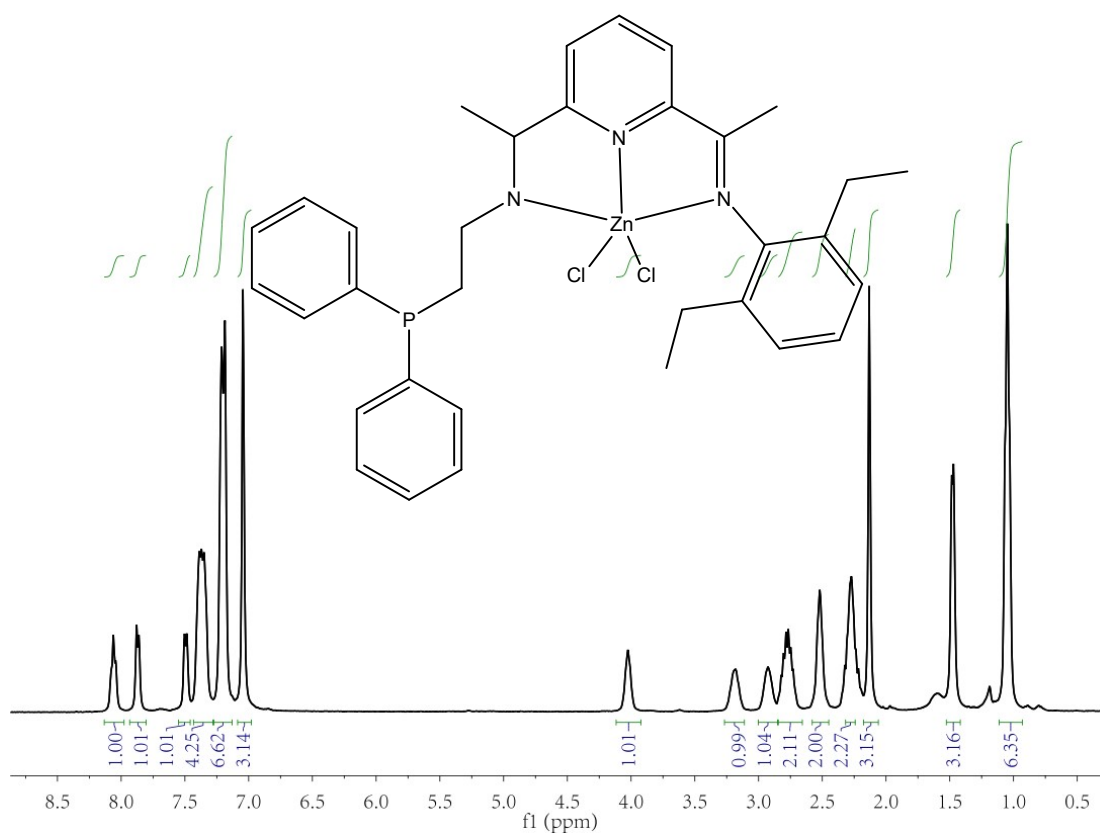

**Figure S27** <sup>1</sup>H NMR spectrum of Zn2 recorded in CDCl<sub>3</sub> at 25 °C

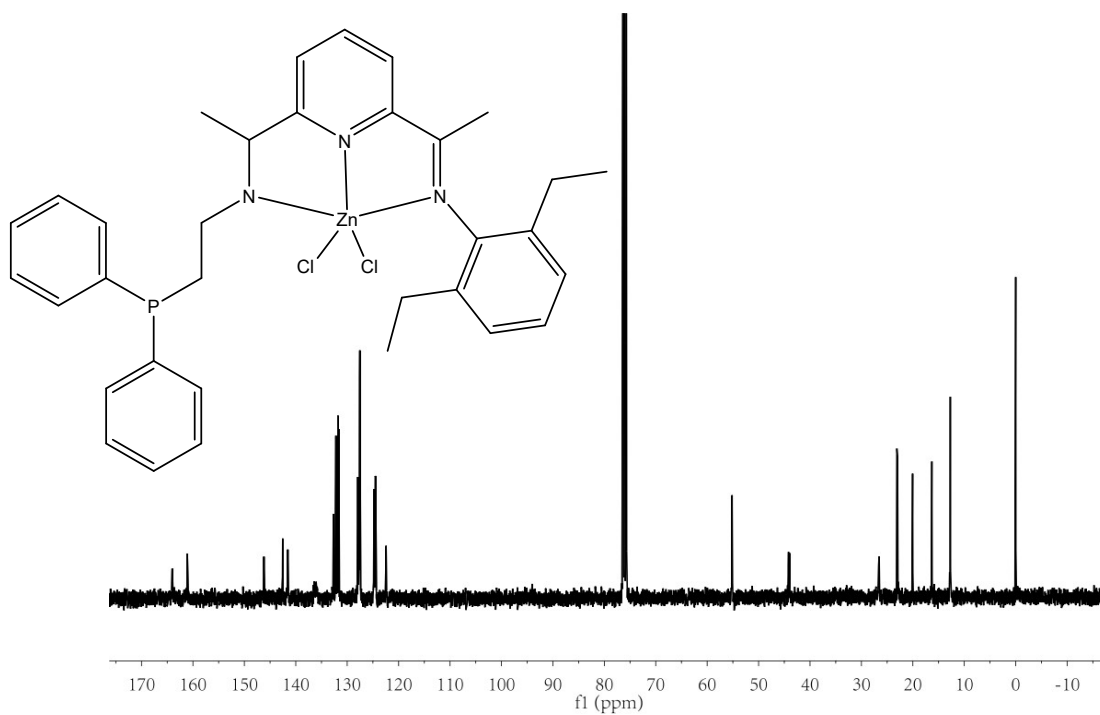

**Figure S28** <sup>13</sup>C NMR spectrum of Zn2 recorded in CDCl<sub>3</sub> at 25 °C

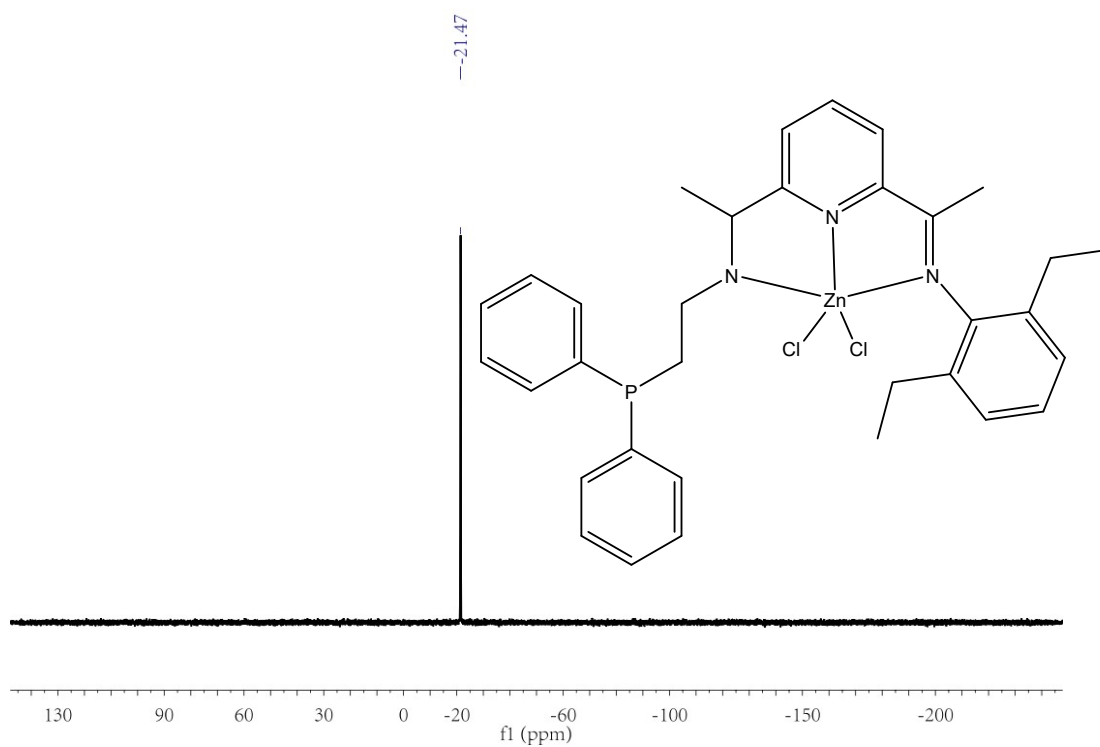

**Figure S29**  $^{31}\text{P}$  NMR spectrum of Zn2 recorded in  $\text{CDCl}_3$  at 25 °C

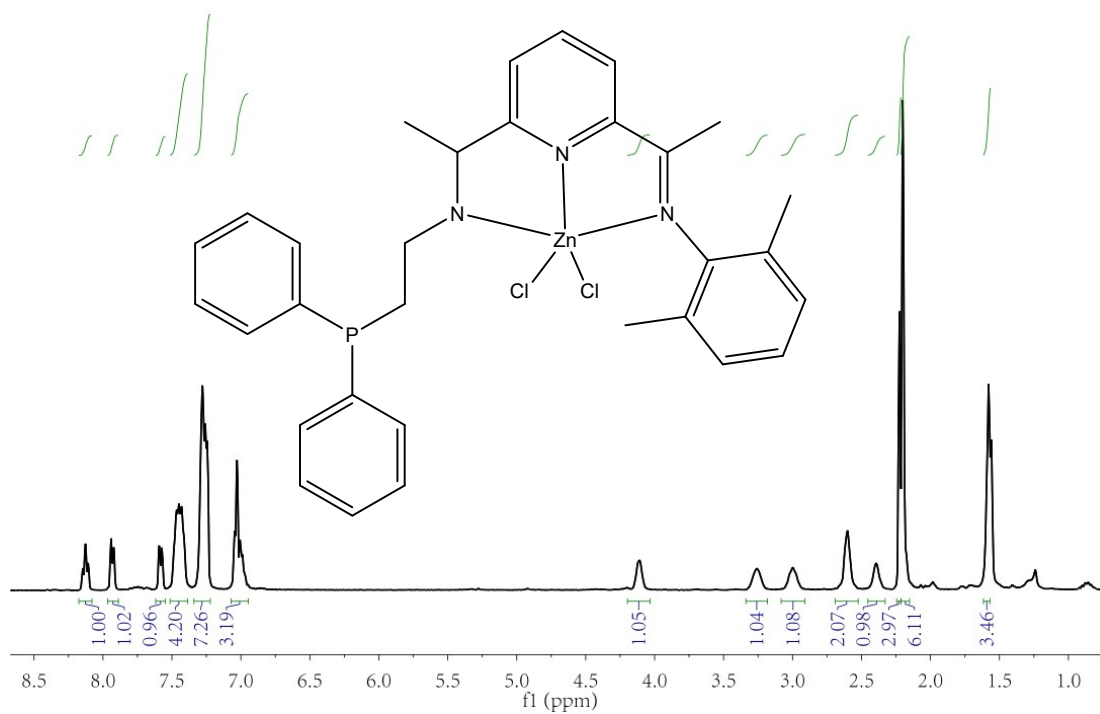

**Figure S30**  $^1\text{H}$  NMR spectrum of Zn3 recorded in  $\text{CDCl}_3$  at 25 °C



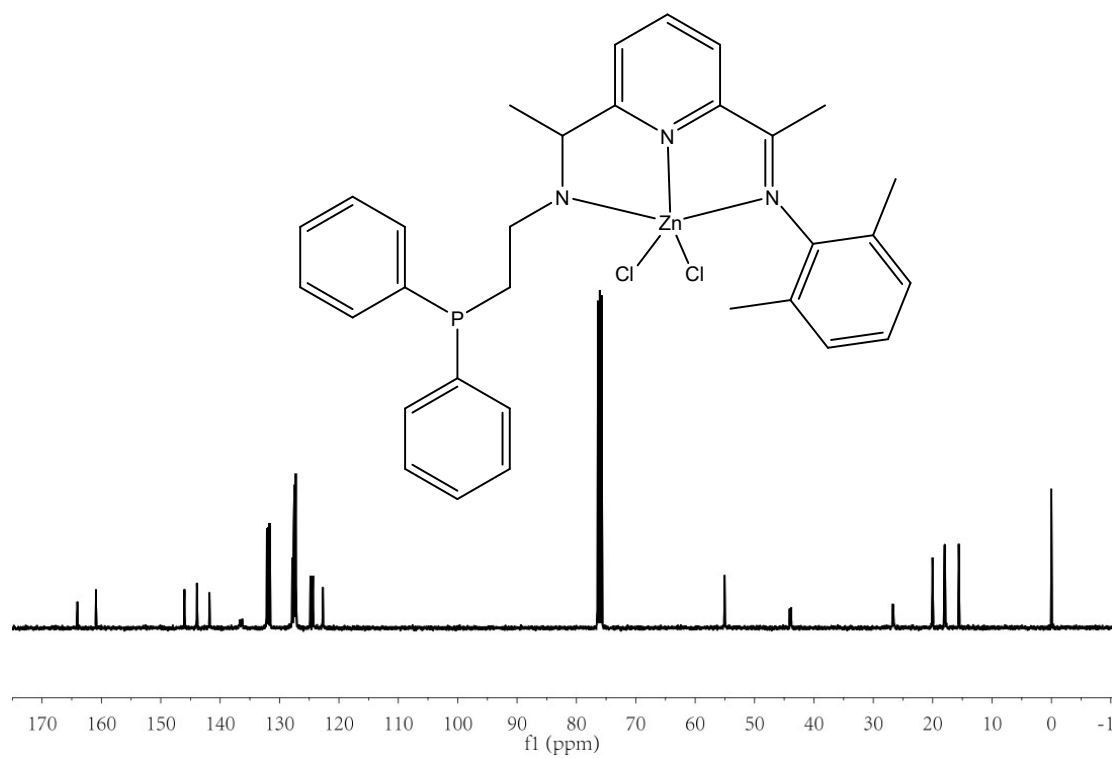

**Figure S31**  $^{13}\text{C}$  NMR spectrum of Zn3 recorded in  $\text{CDCl}_3$  at 25 °C

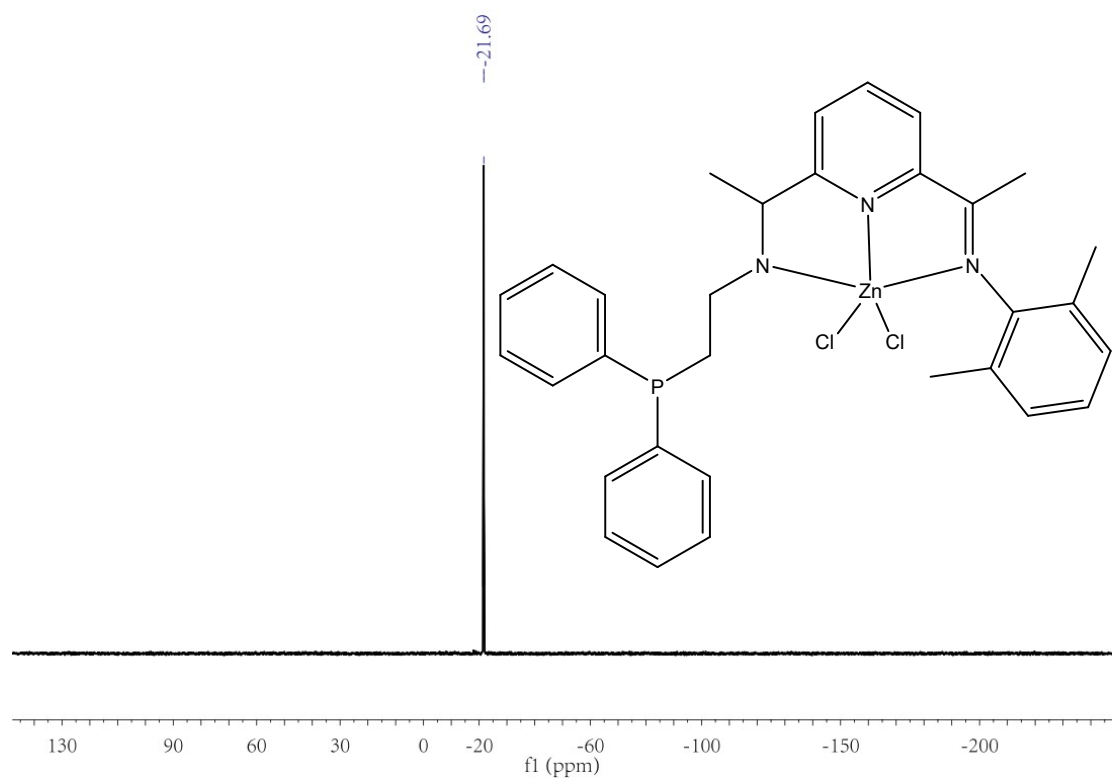

**Figure S32**  $^{31}\text{P}$  NMR spectrum of Zn3 recorded in  $\text{CDCl}_3$  at 25 °C

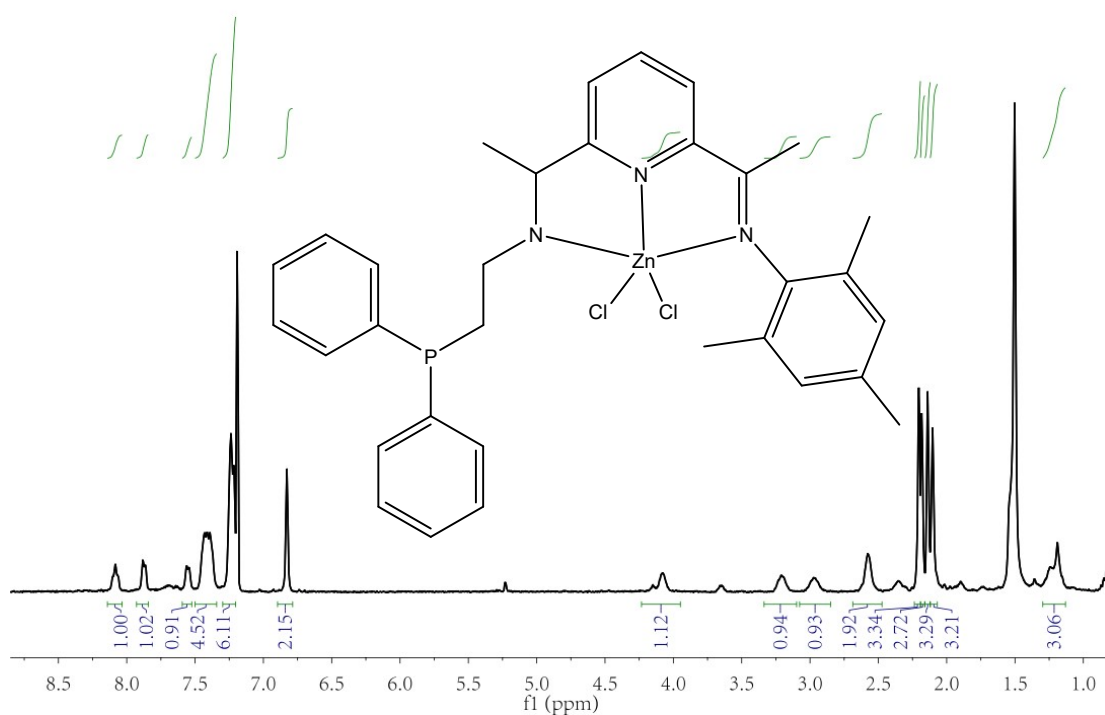

**Figure S33** <sup>1</sup>H NMR spectrum of Zn4 recorded in CDCl<sub>3</sub> at 25 °C

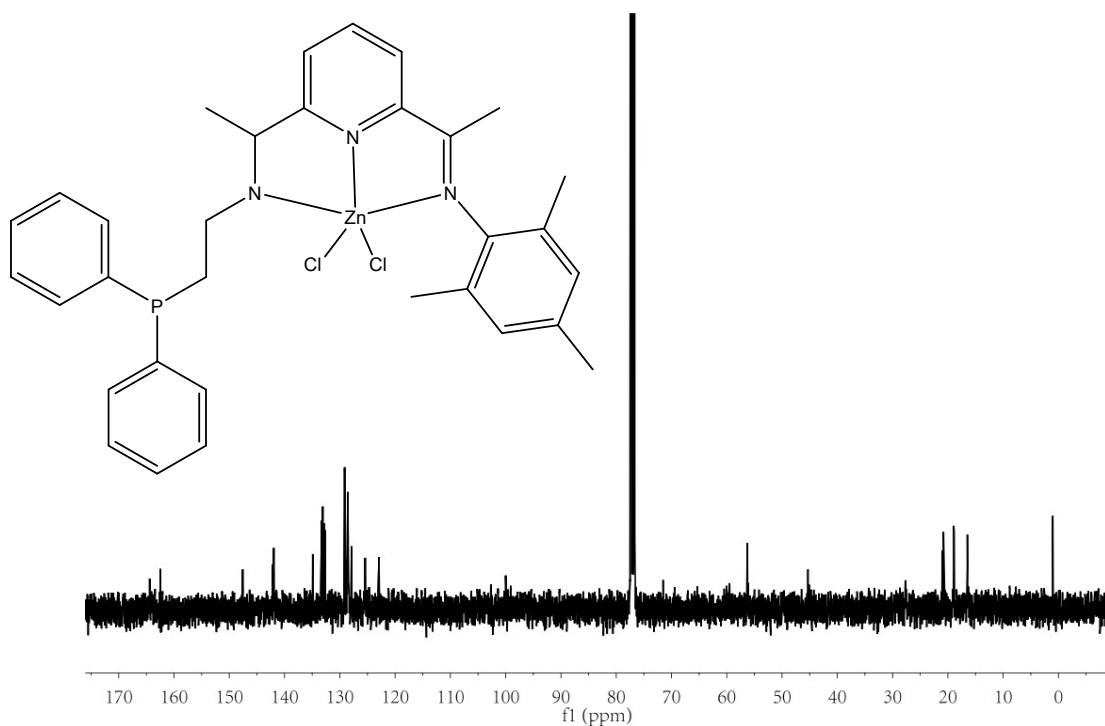

**Figure S34** <sup>13</sup>C NMR spectrum of Zn4 recorded in CDCl<sub>3</sub> at 25 °C

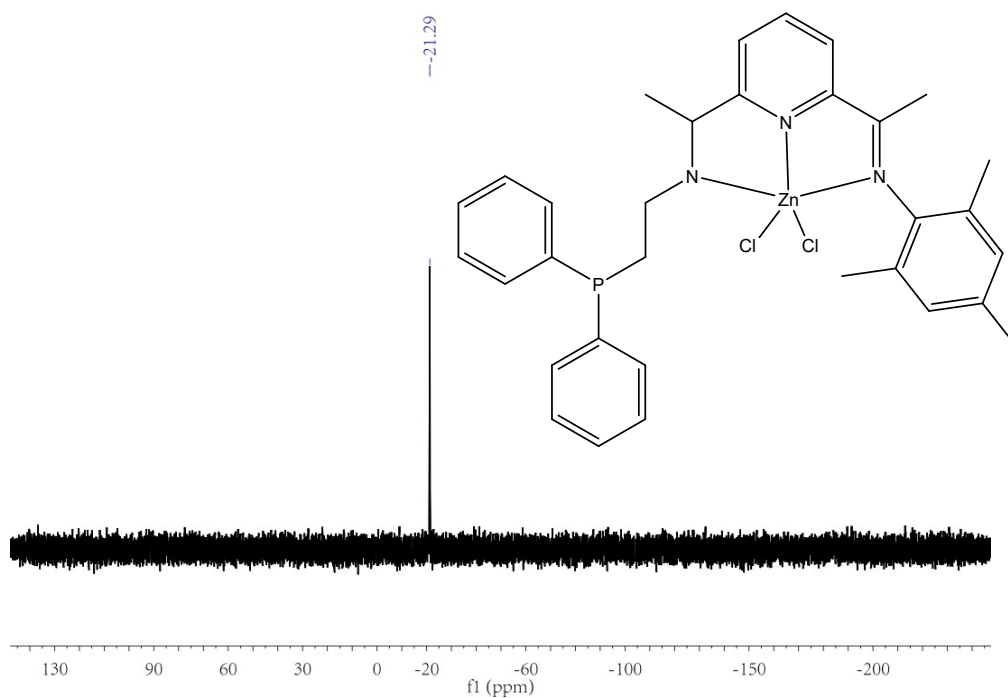

**Figure S35**  $^{31}\text{P}$  NMR spectrum of Zn4 recorded in  $\text{CDCl}_3$  at 25 °C

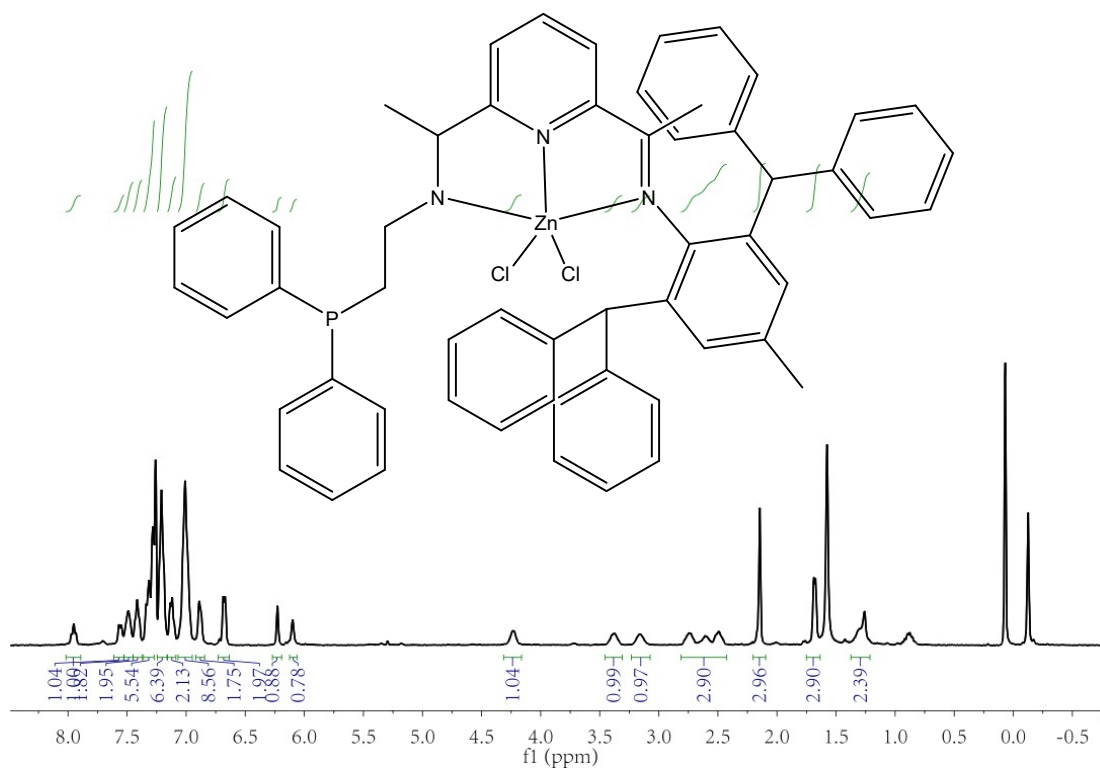

**Figure S36**  $^1\text{H}$  NMR spectrum of Zn5 recorded in  $\text{CDCl}_3$  at 25 °C

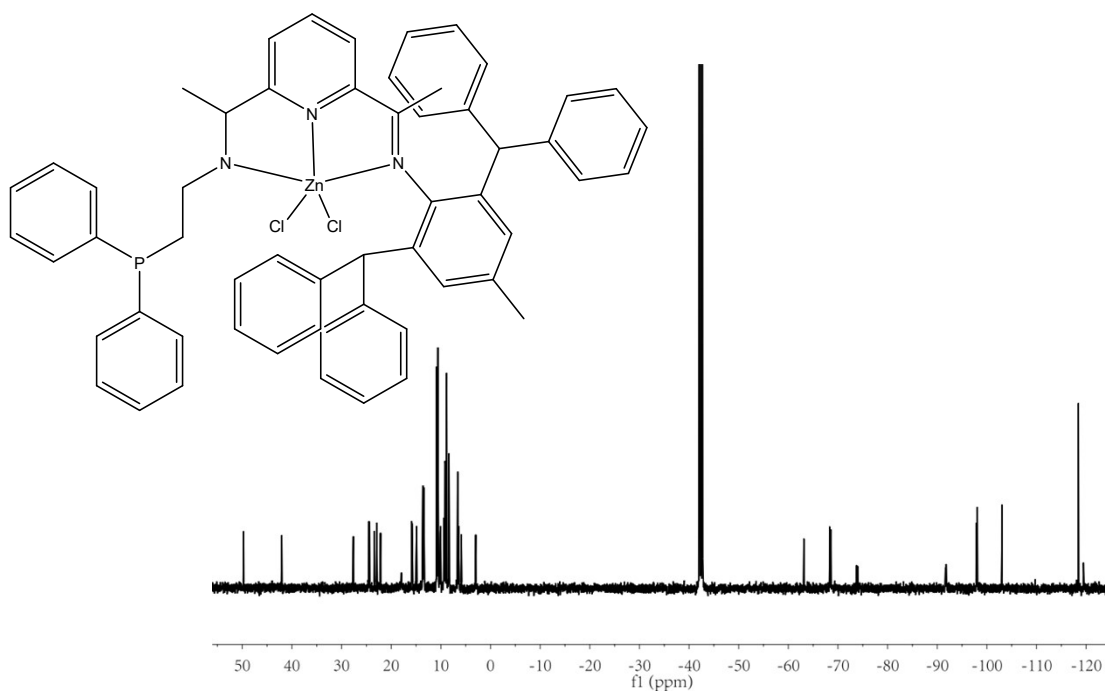

**Figure S37**  $^{13}\text{C}$  NMR spectrum of Zn5 recorded in  $\text{CDCl}_3$  at  $25^\circ\text{C}$

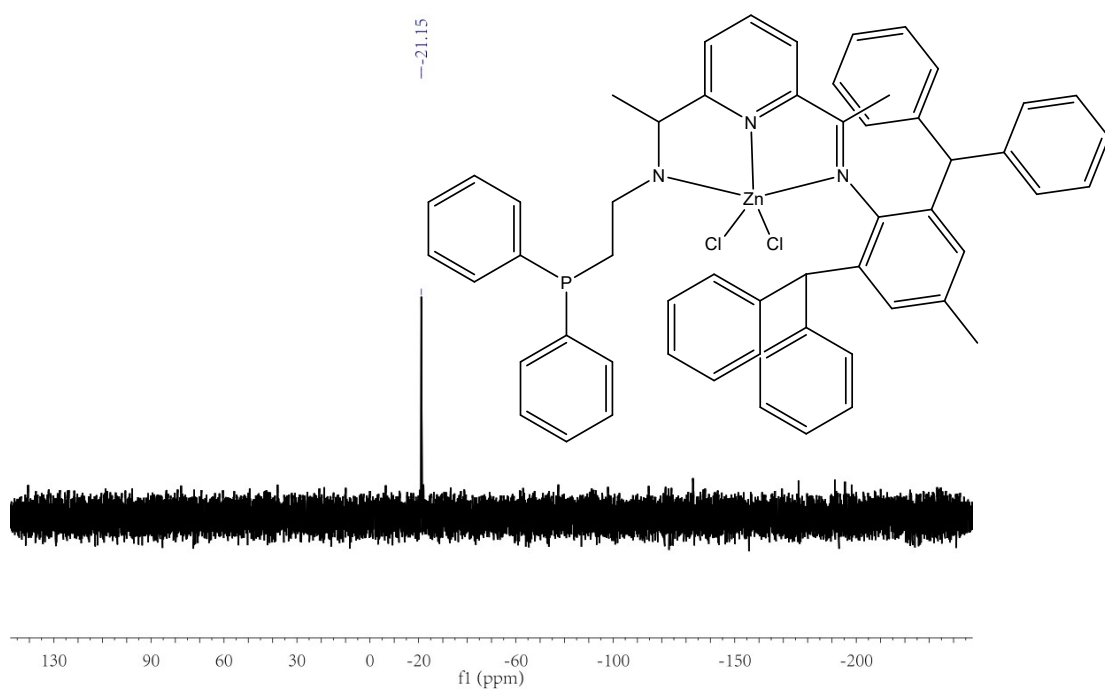

**Figure S38**  $^{31}\text{P}$  NMR spectrum of Zn5 recorded in  $\text{CDCl}_3$  at  $25^\circ\text{C}$

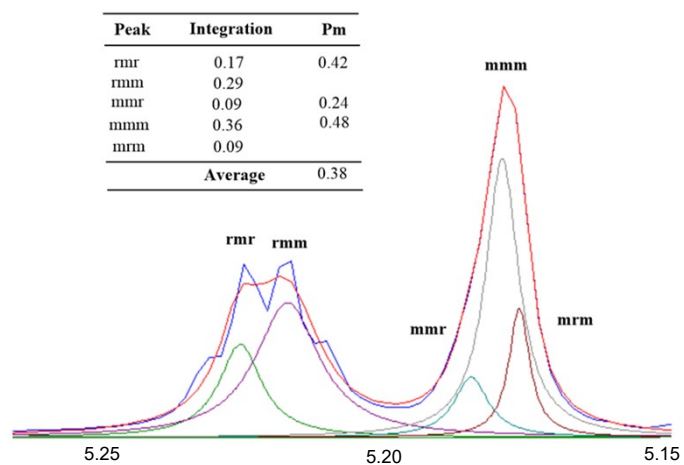

**Figure S39** Decoupled  $^1\text{H}$  NMR spectra of PLAs by **Zn4** (run 6 in Table 3)

**Table SI-1** Comparison of the  $^{31}\text{P}$  NMR chemical shifts for **L1 - L5** with those in **Zn1 - Zn5**

| Compound  | $^{31}\text{P}$ NMR                          | Complex    | $^{31}\text{P}$ NMR                          |
|-----------|----------------------------------------------|------------|----------------------------------------------|
|           | chemical shift<br>(ppm, in $\text{CDCl}_3$ ) |            | chemical shift<br>(ppm, in $\text{CDCl}_3$ ) |
| <b>L1</b> | <b>21.46</b>                                 | <b>Zn1</b> | <b>20.94</b>                                 |
| <b>L2</b> | <b>21.31</b>                                 | <b>Zn2</b> | <b>21.47</b>                                 |
| <b>L3</b> | <b>21.33</b>                                 | <b>Zn3</b> | <b>21.69</b>                                 |
| <b>L4</b> | <b>21.29</b>                                 | <b>Zn4</b> | <b>21.29</b>                                 |
| <b>L5</b> | <b>21.33</b>                                 | <b>Zn5</b> | <b>21.15</b>                                 |
